# Supplementary material for: Implementation of a Targeted Next-Generation Sequencing Panel for Constitutional Newborn Screening in High-Risk Neonates
Source: PubMed Central journal article supplement — Yonsei Med J. 2019 Oct 17;60(11):1061–6. doi: 10.3349/ymj.2019.60.11.1061 (PMC6813152; doi:10.3349/ymj.2019.60.11.1061), 2019-10-17
Supplement: ymj-60-1061-s001.pdf [file ymj-60-1061-s001.pdf]

Supplementary Table 1. The List of 198 Genes

| Gene      | Genetic disorder                                                                                                | Inheritance | Phenotype MIM number        |
|-----------|-----------------------------------------------------------------------------------------------------------------|-------------|-----------------------------|
| ABCD4     | Methylmalonic aciduria and homocystinuria, cblJ type                                                            | AR          | 614857                      |
| ACAD8     | Isobutyryl-CoA dehydrogenase deficiency                                                                         | AR          | 611283                      |
| ACADM     | Acyl-CoA dehydrogenase, medium chain, deficiency of                                                             | AR          | 201450                      |
| ACADS     | Acyl-CoA dehydrogenase, short-chain, deficiency of                                                              | AR          | 201470                      |
| ACADSB    | 2-methylbutyrylglycinuria                                                                                       | AR          | 610006                      |
| ACADVL    | Very long-chain acyl-CoA dehydrogenase deficiency                                                               | AR          | 201475                      |
| ACSF3     | Combined malonic and methylmalonic aciduria                                                                     | AR          | 614265                      |
| ACVRL1    | Telangiectasia, hereditary hemorrhagic, type 2                                                                  | AD          | 600376                      |
| AGL       | Glycogen storage disease IIIa, Glycogen storage disease IIIb                                                    | AR          | 232400                      |
| AIP1      | Leber congenital amaurosis-4 (LCA4)                                                                             | AR          | 604393                      |
| ALDH4A1   | Hyperprolinemia, type II                                                                                        | AR          | 239510                      |
| ALDOB     | Fructose intolerance, hereditary                                                                                | AR          | 229600                      |
| ALPL      | Hypophosphatasia, infantile                                                                                     | AR          | 241500                      |
| ARFGF2    | Periventricular heterotopia with microcephaly                                                                   | AR          | 608097                      |
| ARSA      | Metachromatic leukodystrophy                                                                                    | AR          | 250100                      |
| ARSB      | Mucopolysaccharidosis type VI (Maroteaux-Lamy)                                                                  | AR          | 253200                      |
| ARX       | Epileptic encephalopathy, early infantile, 1                                                                    | XLR         | 308350                      |
| ASL       | Argininosuccinic aciduria                                                                                       | AR          | 207900                      |
| ASPA      | Canavan disease                                                                                                 | AR          | 271900                      |
| ASS1      | Citrullinemia                                                                                                   | AR          | 215700                      |
| ATM       | Ataxia-telangiectasia                                                                                           | AR          | 208900                      |
| ATP7A     | Menkes disease                                                                                                  | XLR         | 309400                      |
| ATP7B     | Wilson disease                                                                                                  | AR          | 253200                      |
| ATP8B1    | Cholestasis, progressive familial intrahepatic 1                                                                | AR          | 211600                      |
| AUH       | 3-methylglutaconic aciduria, type I                                                                             | AR          | 250950                      |
| BCAT1     | Hyperleucinemia-isoleucinemia or hypervalinemia                                                                 | AR          | 113520                      |
| BCAT2     | Hypervalinemia or hyperleucine-isoleucinemia                                                                    | AR          | 113530                      |
| BMPR2     | Pulmonary hypertension, familial primary, 1, with or without hereditary hemorrhagic telangiectasia              | AD          | 178600                      |
| BRAF      | Cardiofaciocutaneous syndrome                                                                                   | AD          | 115150                      |
| BTBD      | Biotinidase deficiency                                                                                          | AR          | 253260                      |
| BTK       | Agammaglobulinemia, X-linked 1                                                                                  | XLR         | 300755                      |
| C2CD3     | Orofaciodigital syndrome XIV                                                                                    | AR          | 615948                      |
| C5orf42   | Orofaciodigital syndrome VI/Joubert syndrome 17                                                                 | AR          | 27170/614615                |
| CACNA1S   | Hypokalemic periodic paralysis, type 1                                                                          | AD          | 170400                      |
| CD320     | Methylmalonic aciduria, transient, due to transcobalamin receptor defect                                        | AR          | 613646                      |
| CDKL5     | Epileptic encephalopathy, early infantile, 2                                                                    | XLD         | 300672                      |
| CEP290    | Leber congenital amaurosis 10/Joubert syndrome 5                                                                | AR          | 611755/610188               |
| CFTR      | Cystic fibrosis                                                                                                 | AR          | 219700                      |
| CHD7      | CHARGE syndrome                                                                                                 | AD          | 214800                      |
| CLCN7     | Osteopetrosis, autosomal dominant 2/Osteopetrosis, autosomal recessive 4                                        | AD/AR       | 166600/611490               |
| CLN3      | Ceroid lipofuscinosis, neuronal, 3                                                                              | AR          | 204200                      |
| CLPB      | 3-methylglutaconic aciduria, type VII, with cataracts, neurologic involvement and neutropenia                   | AR          | 616271                      |
| CNBP      | Myotonic dystrophy 2                                                                                            | AD          | 602668                      |
| COL11A1   | Marshall syndrome/Stickler syndrome, type II                                                                    | AD          | 154780/604841               |
| COL11A2   | Otospondylomegaepiphyseal dysplasia                                                                             | AD/AR       | 184840/215150               |
| COL1A2    | Osteogenesis imperfecta, type III/typeIV                                                                        | AD          | 259420/166220               |
| COL2A1    | Achondrogenesis, type II or hypochondrogenesis                                                                  | AD          | 200610                      |
| COL4A3    | Alport syndrome, autosomal dominant/autosomal recessive                                                         | AD/AR       | 104200/203780               |
| COL4A4    | Alport syndrome, autosomal recessive                                                                            | AR          | 203780                      |
| COL4A5    | Alport syndrome                                                                                                 | XLD         | 301050                      |
| COL9A1    | Epiphyseal dysplasia, multiple, 6/Stickler syndrome, type IV                                                    | AD/AR       | 614135/614134               |
| COMP      | Epiphyseal dysplasia, multiple, 1                                                                               | AD          | 132400                      |
| CPT1A     | Carnitine palmitoyltransferase deficiency, hepatic, type IA                                                     | AR          | 255120                      |
| CPT2      | Carnitine palmitoyltransferase II deficiency, infantile                                                         | AR          | 600649                      |
| CTNS      | Cystinosis, nephropathic                                                                                        | AR          | 219800                      |
| CYBB      | Chronic granulomatous disease, X-linked                                                                         | XLR         | 306400                      |
| CYP21A2   | Adrenal hyperplasia, congenital, due to 21-hydroxylase deficiency                                               | AR          | 201910                      |
| DDX59     | Orofaciodigital syndrome V                                                                                      | AR          | 174300                      |
| DES       | Cardiomyopathy, dilated, 11/Muscular dystrophy, limb-girdle, type 2R                                            | AD/AR       | 604765/615325               |
| DHCR7     | Smith-Lemli-Opitz syndrome                                                                                      | AR          | 270400                      |
| DLAT      | Pyruvate dehydrogenase E2 deficiency                                                                            | AR          | 245348                      |
| DMD       | Duchenne muscular dystrophy                                                                                     | XLR         | 310200                      |
| DNAJC19   | 3-methylglutaconic aciduria, type V                                                                             | AR          | 610198                      |
| DUOX2     | Thyroid dysmorphogenesis 6                                                                                      | AR          | 607200                      |
| ENG       | Telangiectasia, hereditary hemorrhagic, type 1                                                                  | AD          | 187300                      |
| ETHE1     | Ethylmalonic encephalopathy                                                                                     | AR          | 602473                      |
| EYA1      | Otofaciocervical syndrome/Branchiootic syndrome 1                                                               | AD          | 166780/602588               |
| F8        | Hemophilia A                                                                                                    | XLR         | 306700                      |
| FAH       | Tyrosinemia, type I                                                                                             | AR          | 276700                      |
| FBN1      | Marfan syndrome                                                                                                 | AD          | 154700                      |
| FGFR1     | Pfeiffer syndrome                                                                                               | AD          | 101600                      |
| FGFR2     | Apert syndrome /Crouzon syndrome                                                                                | AD          | 101200/123500               |
| FGFR3     | Achondroplasia/Hypochondroplasia                                                                                | AD          | 100800/146000               |
| FLNA      | Congenital short bowel syndrome/Heterotopia, periventricular                                                    | XLR/XLD     | 300048/300049               |
| G6PC      | Glycogen storage disease Ia                                                                                     | AR          | 232200                      |
| GAA       | Glycogen storage disease II                                                                                     | AR          | 232300                      |
| GALC      | Krabbe disease                                                                                                  | AR          | 245200                      |
| GALK1     | Galactokinase deficiency with cataracts                                                                         | AR          | 230200                      |
| GALT      | Galactosemia                                                                                                    | AR          | 230400                      |
| GBA       | Gaucher disease I, II, III                                                                                      | AR          | 230800                      |
| GCDH      | Glutaric aciduria, type I                                                                                       | AR          | 231670                      |
| GCH1      | Dystonia, DOPA-responsive/Hyperphenylalaninemia, BH4-deficient, B                                               | AD/AR       | 128230/233910               |
| GLA       | Fabry disease                                                                                                   | XL          | 301500                      |
| GLB1      | GM1-gangliosidosis, type I/Mucopolysaccharidosis type IV B (Morquio)                                            | AR          | 230500/253010               |
| GLIS3     | Diabetes mellitus, neonatal, with congenital hypothyroidism                                                     | AR          | 610199                      |
| GNAS      | Pseudohypoparathyroidism Ia/lb/lc                                                                               | AD          | 103580/603233/612462        |
| GUCY2D    | Leber congenital amaurosis 1                                                                                    | AR          | 204000                      |
| HADH      | 3-hydroxyacyl-CoA dehydrogenase deficiency /Hyperinsulinemic hypoglycemia, familial, 4                          | AR          | 231530/609975               |
| HADHA     | Long-chain hydroxyacyl-CoA dehydrogenase (LCHAD) deficiency/Trifunctional protein deficiency                    | AR          | 609016/609015               |
| HADHB     | Trifunctional protein deficiency                                                                                | AR          | 609015                      |
| HAL       | Histidinemia                                                                                                    | AD, AR      | 235800                      |
| HBA1      | Thalassemias, alpha-                                                                                            | AD          | 604131                      |
| HBA2      | Thalassemias, alpha-                                                                                            | AD          | 604131                      |
| HBB       | Delta-beta thalassemia/Sickle cell anemia                                                                       | AD/AR       | 141749/603903               |
| HLCS      | Holocarboxylase synthetase deficiency                                                                           | AR          | 253270                      |
| HMGCL     | HMG-CoA lyase deficiency                                                                                        | AR          | 246450                      |
| HSD17B10  | HSD10 mitochondrial disease                                                                                     | XLD         | 300438                      |
| IDS       | Mucopolysaccharidosis II                                                                                        | XLR         | 309900                      |
| IDUA      | Mucopolysaccharidosis IIh/lhs/lis                                                                               | AS          | 607014/607015/607016        |
| IGSF1     | Hypothyroidism, central, and testicular enlargement                                                             | XLR         | 300888                      |
| IKBK      | Incontinentia pigmenti                                                                                          | XLD         | 308300                      |
| IL2RG     | Severe combined immunodeficiency, X-linked                                                                      | XLR         | 300400                      |
| IVD       | Isovaleric acidemia                                                                                             | AR          | 243500                      |
| IYD       | Thyroid dysmorphogenesis 4                                                                                      | AR          | 274800                      |
| JAG1      | Alagille syndrome 1                                                                                             | AD          | 118450                      |
| KIF1B     | Charcot-Marie-Tooth disease, type 2A1                                                                           | AD          | 118210                      |
| KRAS      | Noonan syndrome 3                                                                                               | AD          | 609942                      |
| L1CAM     | MASA (mental retardation, aphasia, shuffling gait, and adducted thumbs) syndrome, CRASH syndrome                | AR          | 303350                      |
| LMNA      | Muscular dystrophy, congenital/Emery-Dreifuss muscular dystrophy 2, AD/AR/Charcot-Marie-Tooth disease, type 2B1 | AD/AD/AR    | 613205/181350/616516/605588 |
| LRP5      | Osteopetrosis, autosomal dominant 1/Osteoporosis-pseudoglioma syndrome                                          | AD/AR       | 607634/259770               |
| MCCC1     | 3-Methylcrotonyl-CoA carboxylase 1 deficiency                                                                   | AR          | 210200                      |
| MCCC2     | 3-Methylcrotonyl-CoA carboxylase 2 deficiency                                                                   | AR          | 210210                      |
| MECP2     | Rett syndrome                                                                                                   | XLD         | 312750                      |
| MFN2      | Charcot-Marie-Tooth disease, axonal, type 2A2A/2A2B                                                             | AD/AR       | 609260/617087               |
| MLYCD     | Malonyl-CoA decarboxylase deficiency                                                                            | AR          | 248360                      |
| MUT       | Methylmalonic aciduria, mut(0) type                                                                             | AR          | 251000                      |
| NF1       | Neurofibromatosis, type 1                                                                                       | AD          | 162200                      |
| NF2       | Neurofibromatosis, type 2                                                                                       | AD          | 101000                      |
| NKX2-1    | Choreoathetosis, hypothyroidism, and neonatal respiratory distress                                              | AD          | 610978                      |
| NKX2-5    | Hypothyroidism, congenital nongoitrous, 5                                                                       | AD          | 225250                      |
| NRAS      | Noonan syndrome 6                                                                                               | AD          | 613224                      |
| OAT       | Gyrate atrophy of choroid and retina with or without ornithinemia                                               | AR          | 258870                      |
| OFD1      | Orofaciodigital syndrome I /Joubert syndrome 10                                                                 | XLD/XLR     | 311200/300804               |
| OPA3      | 3-methylglutaconic aciduria, type III/Optic atrophy 3 with cataract                                             | AR/AD       | 258501/165300               |
| OSTM1     | Osteopetrosis, autosomal recessive 5                                                                            | AR          | 259720                      |
| OTC       | Ornithine transcarbamylase deficiency                                                                           | XLR         | 311250                      |
| PAH       | Phenylketonuria                                                                                                 | AR          | 261600                      |
| PCBD1     | Hyperphenylalaninemia, BH4-deficient, D                                                                         | AR          | 264070                      |
| PCCA      | Propionic acidemia                                                                                              | AR          | 606054                      |
| PCCB      | Propionic acidemia                                                                                              | AR          | 606054                      |
| PDHA1     | Pyruvate dehydrogenase E1-alpha deficiency                                                                      | XLD         | 312170                      |
| PDHB      | Pyruvate dehydrogenase E1-beta deficiency                                                                       | AR?         | 614111                      |
| PEX1      | Peroxisome biogenesis disorder 1A (Zellweger)                                                                   | AR          | 214100                      |
| PEX10     | Peroxisome biogenesis disorder 6A (Zellweger)/6B                                                                | AR          | 614870/614871               |
| PEX12     | Peroxisome biogenesis disorder 3A (Zellweger)/3B                                                                | AR          | 614859/266510               |
| PEX13     | Peroxisome biogenesis disorder 11A (Zellweger)/11B                                                              | AR          | 614883/614885               |
| PEX14     | Peroxisome biogenesis disorder 13A (Zellweger)                                                                  | AR          | 614887                      |
| PEX16     | Peroxisome biogenesis disorder 8A (Zellweger)/8B                                                                | AR          | 614876/614877               |
| PEX19     | Peroxisome biogenesis disorder 12A (Zellweger)                                                                  | AR          | 614886                      |
| PEX2      | Peroxisome biogenesis disorder 5A (Zellweger)/5B                                                                | AR          | 614866/614867               |
| PEX26     | Peroxisome biogenesis disorder 7A (Zellweger)/7B                                                                | AR          | 614872/614873               |
| PEX3      | Peroxisome biogenesis disorder 10A (Zellweger)/10B                                                              | AR          | 614882/617370               |
| PEX5      | Peroxisome biogenesis disorder 2A (Zellweger)/2B                                                                | AR          | 214110/202370               |
| PEX6      | Peroxisome biogenesis disorder 4A (Zellweger)/4B                                                                | AR          | 614862/614863               |
| PHEX      | Hypophosphatemic rickets, X-linked dominant                                                                     | XLD         | 307800                      |
| PHOX2B    | Central hypoventilation syndrome, congenital, with or without Hirschsprung disease                              | AD          | 209880                      |
| PKD1      | Polycystic kidney disease 1                                                                                     | AD          | 173900                      |
| PKD2      | Polycystic kidney disease 2                                                                                     | AD          | 613095                      |
| PKHD1     | Polycystic kidney disease 4, with or without hepatic disease                                                    | AR          | 263200                      |
| PLEKHM1   | Osteopetrosis, autosomal recessive 6                                                                            | AR          | 611497                      |
| PMP22     | Charcot-Marie-Tooth disease, type 1A/1E                                                                         | AD          | 118220/118300               |
| POLR1C    | Leukodystrophy, hypomyelinating, 11/Treacher Collins syndrome 3                                                 | AR          | 616494/248390               |
| POLR1D    | Treacher Collins syndrome 2                                                                                     | AD/AR       | 613717                      |
| PRODH     | Hyperprolinemia, type I                                                                                         | AR          | 239500                      |
| SAP       | Krabbe disease, atypical/Gaucher disease, atypical/ Metachromatic leukodystrophy due to SAP-b deficiency        | AR          | 611722/610539/249900        |
| PITPN1    | Noonan syndrome 1                                                                                               | AD          | 163950                      |
| PTS       | Hyperphenylalaninemia, BH4-deficient, A                                                                         | AR          | 261640                      |
| QDPR      | Hyperphenylalaninemia, BH4-deficient, C                                                                         | AR          | 261630                      |
| RAF1      | Noonan syndrome 5                                                                                               | AD          | 611553                      |
| RBMX      | Mental retardation, X-linked, syndromic 11, Shashi type                                                         | XLR         | 300238                      |
| RPE65     | Leber congenital amaurosis 2                                                                                    | AR          | 204100                      |
| RPGRI1    | Leber congenital amaurosis 6                                                                                    | AR          | 613826                      |
| RPS6KA3   | Coffin-Lowry syndrome/Mental retardation, X-linked 19                                                           | XLD         | 303600/300844               |
| RS1       | Retinoschisis                                                                                                   | XLR         | 312700                      |
| SCN1A     | Epileptic encephalopathy, early infantile, 6 (Dravet syndrome)                                                  | AD          | 607208                      |
| SCN4A     | Myotonia congenita, atypical, acetazolamide-responsive/Hypokalemic periodic paralysis, type 2                   | AD          | 608390/613345               |
| SERAC1    | 3-methylglutaconic aciduria with deafness, encephalopathy, and Leigh-like syndrome                              | AR          | 614739                      |
| SERPINA1  | Emphysema due to alpha-1-antitrypsin deficiency                                                                 | AR          | 613490                      |
| SIX1      | Branchiootorenal syndrome 3                                                                                     | AD          | 608389                      |
| SIX5      | Branchiootorenal syndrome 2                                                                                     | AD          | 610896                      |
| SLC22A5   | Carnitine deficiency, systemic primary                                                                          | AR          | 212140                      |
| SLC25A13  | Citrullinemia, type II, neonatal-onset                                                                          | AR          | 605814                      |
| SLC25A15  | Hyperornithinemia-hyperammonemia-homocitrullinemia syndrome                                                     | AR          | 238970                      |
| SLC37A4   | Glycogen storage disease Ibl/c                                                                                  | AR          | 232220/232240               |
| SLC5A5    | Thyroid dysmorphogenesis 1                                                                                      | AR          | 274400                      |
| SMAD4     | Juvenile polyposis/hereditary hemorrhagic telangiectasia syndrome                                               | AD          | 175050                      |
| SNX10     | Osteopetrosis, autosomal recessive 8                                                                            | AR          | 615085                      |
| SOS1      | Noonan syndrome 4                                                                                               | AD          | 610733                      |
| SPATA7    | Leber congenital amaurosis 3                                                                                    | AR          | 604232                      |
| STX11     | Hemophagocytic lymphohistiocytosis, familial, 4                                                                 | AR          | 603552                      |
| STX16     | Pseudohypoparathyroidism, type IB                                                                               | AD          | 603233                      |
| TAZ       | Barth syndrome                                                                                                  | XLR         | 302060                      |
| TCIRG1    | Osteopetrosis, autosomal recessive 1                                                                            | AR          | 259700                      |
| TCOF1     | Treacher Collins syndrome 1                                                                                     | AD          | 154500                      |
| TCTN3     | Orofaciodigital syndrome IV/Joubert syndrome 18                                                                 | AR          | 258860/614815               |
| THRA      | Hypothyroidism, congenital, nongoitrous, 6                                                                      | AD          | 614450                      |
| TNFRSF11A | Osteopetrosis, autosomal recessive 7/Osteolysis, familial expansile                                             | AR/AD       | 612301/174810               |
| TNFSF11   | Osteopetrosis, autosomal recessive 2                                                                            | AR          | 259710                      |
| TSC1      | Tuberous sclerosis-1                                                                                            | AD          | 191100                      |
| TSC2      | Tuberous sclerosis-2                                                                                            | AD          | 613254                      |
| TSHB      | Hypothyroidism, congenital, nongoitrous 4                                                                       | AR          | 275100                      |
| TSHR      | Hypothyroidism, congenital, nongoitrous, 1/Hyperthyroidism, nonautoimmune                                       | AR/AD       | 275200/609152               |
| UGT1A1    | Crigler-Najjar syndrome, type I/II                                                                              | AR          | 218800/606785               |
| USH2A     | Usher syndrome, type 2A                                                                                         | AR          | 276901                      |
| VHL       | von Hippel-Lindau syndrome                                                                                      | AD          | 193300                      |
| VPS33B    | Arthrogyria, renal dysfunction, and cholestasis 1                                                               | AR          | 208085                      |
| VWF       | von Willebrand disease, type 1/von Willebrand disease, types 2A, 2B, 2M, and 2N                                 | AD/AR       | 193400/613554               |
| WT1       | Wilms tumor, type 1 /Denys-Drash syndrome                                                                       | AD          | 194070/194080               |

MIM, Mendelian Inheritance in Man; AD, autosomal dominant; AR, autosomal recessive; XLD, X-linked dominant; XLR, X-linked recessive.
