# Supplementary material for: Implementation of a Targeted Next-Generation Sequencing Panel for Constitutional Newborn Screening in High-Risk Neonates
Source: PubMed Central journal article supplement — Yonsei Med J. 2019 Oct 17;60(11):1061–6. doi: 10.3349/ymj.2019.60.11.1061 (PMC6813152; doi:10.3349/ymj.2019.60.11.1061), 2019-10-17
Supplement: ymj-60-1061-s002.pdf [file ymj-60-1061-s002.pdf]

**Supplementary Table 2.** Enrichment Summary

| <b>Total length of targeted reference</b> | <b>Total aligned reads</b> | <b>Percent aligned reads</b> | <b>Targeted aligned reads</b> | <b>Read enrichment</b> | <b>Padded target aligned reads</b> | <b>Padded read enrichment</b> | <b>Mean region coverage depth</b> | <b>Target coverage at 1X</b> | <b>Target coverage at 10X</b> | <b>Target coverage at 20X</b> |
|-------------------------------------------|----------------------------|------------------------------|-------------------------------|------------------------|------------------------------------|-------------------------------|-----------------------------------|------------------------------|-------------------------------|-------------------------------|
| 1.46 Mb                                   | 21.3 Mb                    | 99.60%                       | 4.75 Mb                       | 22.30%                 | 4.94 Mb                            | 23.20%                        | 423.5                             | 99.80%                       | 98.10%                        | 95.40%                        |
