# Supplementary material for: Implementation of a Targeted Next-Generation Sequencing Panel for Constitutional Newborn Screening in High-Risk Neonates
Source: PubMed Central journal article supplement — Yonsei Med J. 2019 Oct 17;60(11):1061–6. doi: 10.3349/ymj.2019.60.11.1061 (PMC6813152; doi:10.3349/ymj.2019.60.11.1061), 2019-10-17
Supplement: ymj-60-1061-s003.pdf [file ymj-60-1061-s003.pdf]

**Supplementary Table 3.** Clinical Presentation of Newborn Patients

| ID  | Gender | Gestational age at birth (wk+day) | Birth weight (g) | Clinical descriptions                                                                                                         |
|-----|--------|-----------------------------------|------------------|-------------------------------------------------------------------------------------------------------------------------------|
| D01 | Male   | 39+4                              | 3790             | Newborn sick baby                                                                                                             |
| D02 | Female | 30+4                              | 1390             | VLBW, Prematurity, Patau syndrome                                                                                             |
| D03 | Male   | 30+0                              | 840              | ELBW, Prematurity, meconium plug syndrome, cardiomegaly                                                                       |
| D04 | Male   | 40+0                              | 2890             | Newborn sick baby                                                                                                             |
| D05 | Male   | 31+1                              | 1150             | VLBW, Prematurity, Edward syndrome, gastroschisis                                                                             |
| D06 | Male   | 33+6                              | 1900             | LBW, Prematurity, IUGR                                                                                                        |
| D07 | Male   | 32+5                              | 1800             | LBW, Prematurity, Esophageal atresia with distal tracheoesophageal fistula (Gross type C), imperforate anus                   |
| D08 | Male   | 29+4                              | 1030             | VLBW, Prematurity, moderate BPD, cerebellar hemorrhage                                                                        |
| D09 | Male   | 35+2                              | 1900             | LBW, Prematurity, Chronic renal failure (Left renal agenesis, Right hydronephrosis)                                           |
| D10 | Male   | 23+6                              | 610              | ELBW, Prematurity, Hydrocephalus, Intraventricular hemorrhage, ileostomy                                                      |
| D11 | Male   | 36+5                              | 2570             | Prematurity, VACTERL                                                                                                          |
| D12 | Male   | 34+5                              | 2240             | LBW, Prematurity, cri-du-chat                                                                                                 |
| D13 | Female | 24+6                              | 680              | ELBW, Prematurity, severe BPD                                                                                                 |
| D14 | Female | 40+3                              | 3470             | Hypotonia, kabuki syndrome                                                                                                    |
| D15 | Female | 39+2                              | 3660             | Meningomyelocele                                                                                                              |
| D16 | Male   | 35+2                              | 2570             | Prematurity, Omphalocele                                                                                                      |
| D17 | Male   | 26+6                              | 810              | ELBW, Prematurity, meconium peritonitis, bowel perforation, severe BPD                                                        |
| D18 | Male   | 30+3                              | 1670             | LBW, Prematurity, Ventriculomegaly                                                                                            |
| D19 | Male   | 30+3                              | 1630             | LBW, Prematurity, Congenital diaphragmatic hernia                                                                             |
| D20 | Female | 36+1                              | 2600             | Prematurity, OEIS (omphalocele, exstrophy, imperforate anus, and spinal defects) complex, cloacal exstrophy, Imperforate anus |
| D21 | Female | 40+4                              | 3400             | Newborn sick baby, Respiratory difficulty                                                                                     |
| D22 | Male   | 37+6                              | 3500             | Persistent pulmonary hypertension of the newborn                                                                              |
| D23 | Female | 27+1                              | 950              | ELBW, Prematurity, severe BPD                                                                                                 |
| D24 | Female | 39+3                              | 3500             | Imperforate anus                                                                                                              |
| D25 | Male   | 38+3                              | 2550             | Biliary atresia                                                                                                               |
| D26 | Female | 40+0                              | 3050             | VACTER, Imperforate anus                                                                                                      |
| D27 | Male   | 33+6                              | 2140             | LBW, Prematurity                                                                                                              |
| D28 | Female | 25+4                              | 670              | ELBW, Prematurity, severe BPD                                                                                                 |
| D29 | Female | 36+5                              | 1880             | LBW, Prematurity, Currarino syndrome                                                                                          |
| D30 | Male   | 29+0                              | 850              | ELBW, Prematurity, ambiguous genitalia, cardiomegaly, mild BPD                                                                |
| D31 | Female | 29+5                              | 620              | ELBW, Prematurity, severe BPD                                                                                                 |
| D32 | Male   | 28+2                              | 690              | ELBW, Prematurity severe BPD                                                                                                  |
| D33 | Female | 37+0                              | 1970             | LBW, IUGR, CMV infection                                                                                                      |
| D34 | Male   | 31+2                              | 1930             | LBW, Prematurity pneumonia                                                                                                    |
| D35 | Male   | 40+0                              | 3000             | Vomiting, Sepsis, pneumomediastinum                                                                                           |
| D36 | Female | 38+5                              | 3240             | Choledochal cyst                                                                                                              |
| D37 | Female | 29+5                              | 700              | ELBW, IUGR, BPD, necrotizing enterocolitis, ileostomy,                                                                        |
| D38 | Male   | 40+5                              | 2860             | Neonatal hyperbilirubinemia,                                                                                                  |
| D39 | Male   | 37+1                              | 2100             | Floppy infantile syndrome, Hypoxic ischemic encephalopathy, intracranial hemorrhage                                           |
| D40 | Female | 38+1                              | 2310             | LBW, cri du chat syndrome                                                                                                     |
| D41 | Female | 28+1                              | 1170             | VLBW, Prematurity                                                                                                             |
| D42 | Male   | 37+2                              | 1350             | VLBW, Methicillin-resistant Staphylococcus aureus sepsis                                                                      |
| D43 | Male   | 38+0                              | 3300             | Imperforate anus, colostomy                                                                                                   |
| D44 | Male   | 31+4                              | 1460             | ELBW, Prematurity                                                                                                             |
| D45 | Female | 31+4                              | 1350             | ELBW, Prematurity                                                                                                             |
| D46 | Female | 28+0                              | 1230             | VLBW, Prematurity, moderate BPD, neonatal apnea                                                                               |
| D47 | Female | 25+6                              | 800              | VLBW, Prematurity, Floppy infantile syndrome                                                                                  |
| D48 | Male   | 37+2                              | 2200             | LBW, SDH                                                                                                                      |

VLBW, very low birth weight (<1500 g); ELBW, extremely low birth weight (<1000 g); LBW, low birth weight (<2500 g); IUGR, intrauterine growth retardation; BPD, Bronchopulmonary dysplasia; CMV, cytomegalovirus.
