# Supplementary material for: Implementation of a Targeted Next-Generation Sequencing Panel for Constitutional Newborn Screening in High-Risk Neonates
Source: PubMed Central journal article supplement — Yonsei Med J. 2019 Oct 17;60(11):1061–6. doi: 10.3349/ymj.2019.60.11.1061 (PMC6813152; doi:10.3349/ymj.2019.60.11.1061), 2019-10-17
Supplement: ymj-60-1061-s004.pdf [file ymj-60-1061-s004.pdf]

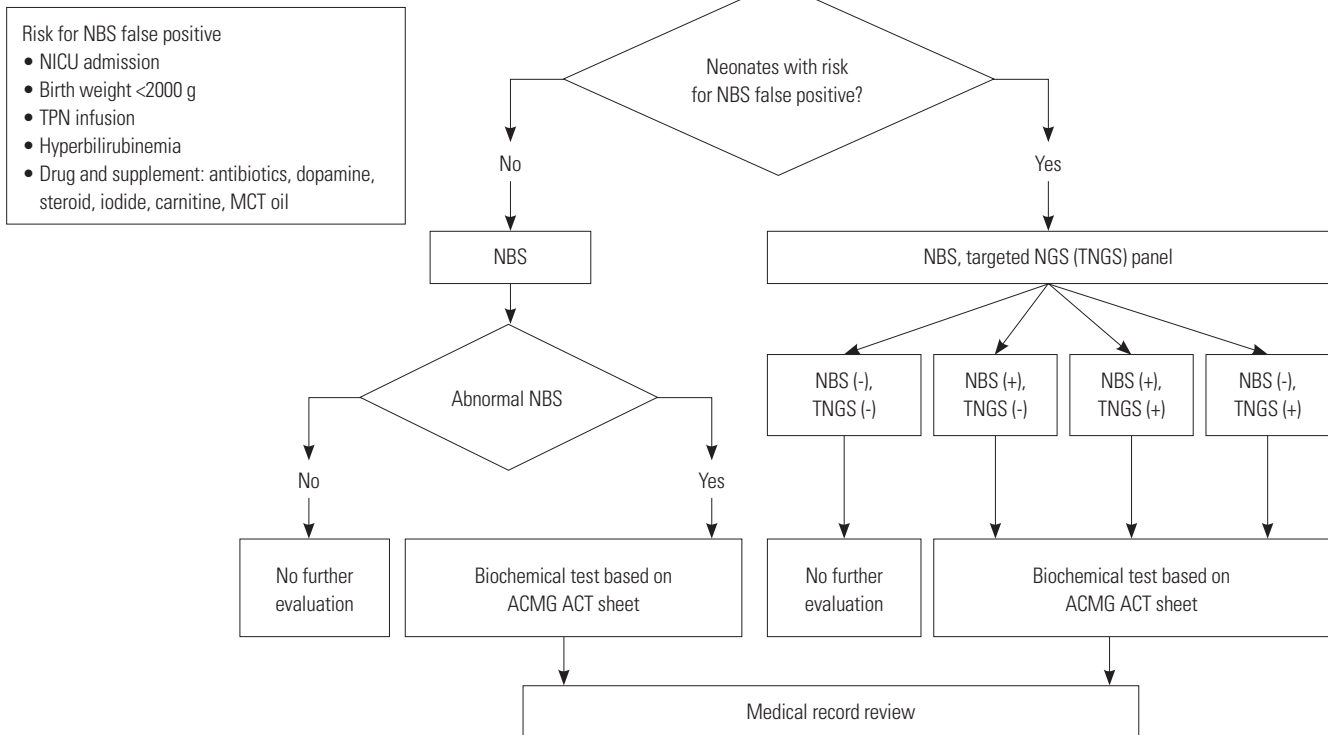

**Supplementary Fig. 1.** A new algorithm proposed for the diagnosis of inborn errors of metabolism in newborns at risk for false positive results in newborn screening (NBS). TPN, total parenteral nutrition; NICU, neonatal intensive care units; MCT, medium-chain triglycerides; NGS, next-generation sequencing; ACMG, American College of Medical Genetics and Genomics; TNGS, targeted next-generation sequencing; TNGS (+), detection of variants that are likely pathogenic, pathogenic, or of unknown significance; TNGS (-), detection of benign or likely benign variants or no variant detected; NBS (+), abnormal result; NBS (-), no remarkable result.
